# Supplementary material for: High Prevalence, Genetic Diversity, and Recombination of Porcine Sapelovirus in Pig Farms in Fujian, Southern China
Source: MDPI journal article supplement (doi:10.3390/v15081751), 2023-08-17
Supplement: s1 [file s1]

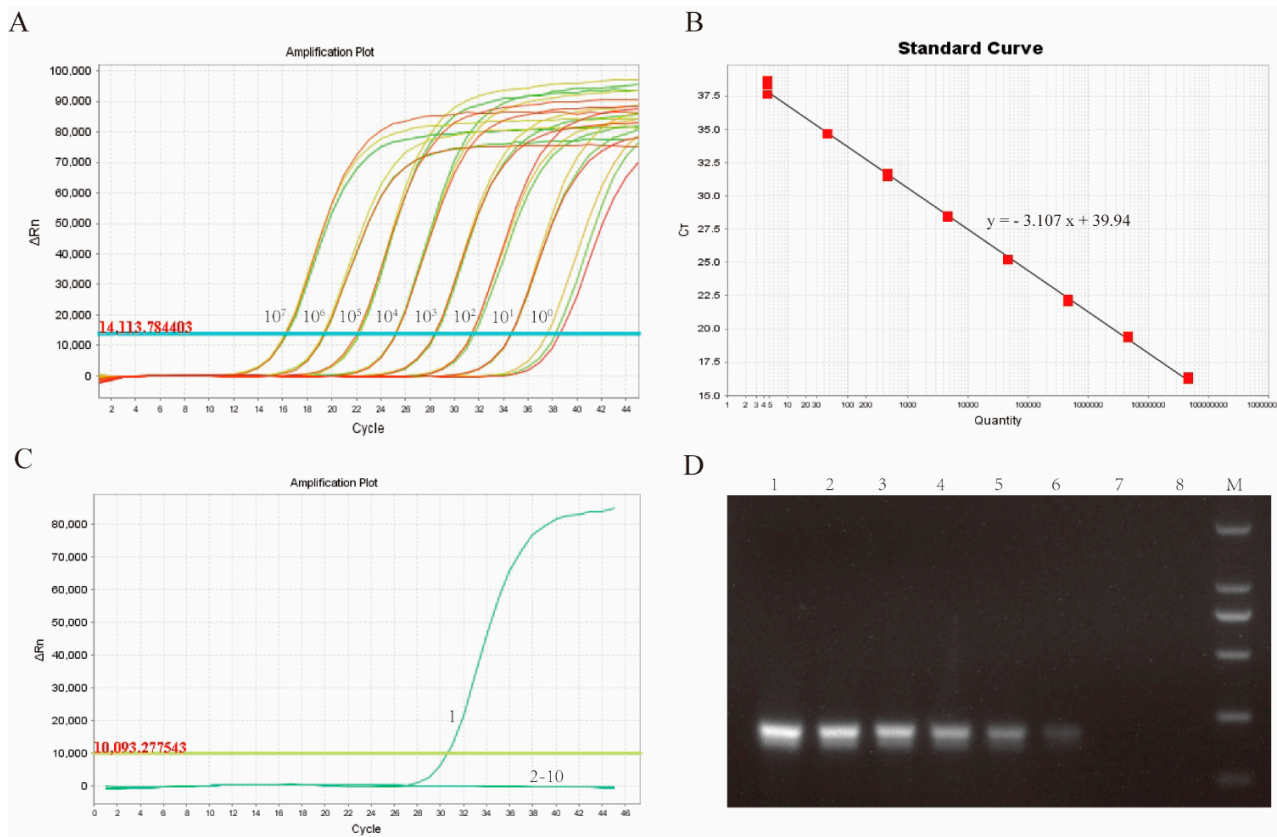

### Supplementary Figure S1. Establishment of TaqMan-based real-time PCR for PSV.

(A) Amplification kinetics of real-time PCR. The assay was conducted using ten-fold serial dilutions of the plasmid with  $4.67 \times 10^7 \sim 4.67$  copies/ $\mu$ L.

(B) Standard curve of real-time PCR.

(C) Specificity of the real-time PCR assay. 1: PSV; 2-10: CSFV, PRV, PRRSV, PEDV, TGEV, PoRV, PDCoV, PTV, and negative control.

(D) Sensitivity of conventional PCR for PSV detection. M: DL 2000 marker; 1-7 were  $4.67 \times 10^7 \sim 4.67 \times 10^1$  copies/ $\mu$ L plasmid concentration; 8: negative control.
