# Supplementary material for: High Prevalence, Genetic Diversity, and Recombination of Porcine Sapelovirus in Pig Farms in Fujian, Southern China
Source: MDPI journal article supplement (doi:10.3390/v15081751), 2023-08-17
Supplement: s1 [file s1]

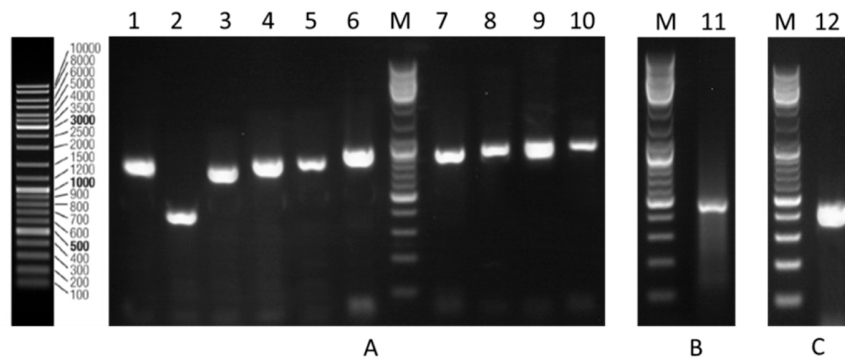

**Supplementary Figure S2. PSV whole genome PCR amplicon gel electrophoresis.**

(A) Internal region of PSV genome PCR amplification gel bands. (B) 3' RACE PCR amplification gel bands. (C) 5' RACE PCR amplification gel bands.
