# Supplementary material for: High Prevalence, Genetic Diversity, and Recombination of Porcine Sapelovirus in Pig Farms in Fujian, Southern China
Source: MDPI journal article supplement (doi:10.3390/v15081751), 2023-08-17
Supplement: s1 [file s1]

Supplementary Table S3 List of all PSVs used in this study

| NO | Virus isolate                   | Collection date | Genbank Accession No. | Geographic origin | Sequence length |
|----|---------------------------------|-----------------|-----------------------|-------------------|-----------------|
| 1  | csh                             | 2009            | HQ875059.1            | China             | 7502            |
| 2  | KS055217                        | 2005            | KJ821021.1            | South Korea       | 7542            |
| 3  | KS05151                         | 2005            | KJ821020.1            | South Korea       | 7566            |
| 4  | KS04105                         | 2004            | KJ821019.1            | South Korea       | 7542            |
| 5  | YC2011                          | 2011            | JX286666.1            | China             | 7572            |
| 6  | JD2011                          | 2011            | KF539414.1            | China             | 7572            |
| 7  | IVRI/PSV/SPF/C-6/2015           | 2015            | KY053835.1            | India             | 7491            |
| 8  | PSV/IND/TN-400-tc/2016          | 2016            | MN241820.1            | India             | 7467            |
| 9  | PSV/IND/WB-76-tc/2018           | 2018            | MN241819.1            | India             | 7494            |
| 10 | HaN01-CH2019                    | 2019            | MT080999.1            | China             | 7551            |
| 11 | SwPSV75BO2012                   | 2012            | MN836683.1            | Italy             | 7560            |
| 12 | SHCM2019                        | 2019            | MN685785.1            | China             | 7567            |
| 13 | JXXY-C                          | 2017            | MH626635.1            | China             | 7557            |
| 14 | DIAPD5469-10                    | 2015            | MK497044.1            | Italy             | 7564            |
| 15 | PSV-C                           | 2016            | MG732814.1            | China             | 7564            |
| 16 | PSV-A2                          | 2016            | MG732813.1            | China             | 7564            |
| 17 | USA/IA33375/2015                | 2015            | KX574284.1            | USA               | 7565            |
| 18 | V13                             | UK              | AF406813.1            | Germany           | 7491            |
| 19 | HNNY-04/CHN/2018                | 2018            | MN755860.1            | China             | 7576            |
| 20 | HNNY-03/CHN/2018                | 2018            | MN755859.1            | China             | 7576            |
| 21 | HNNY-02/CHN/2018                | 2018            | MN755858.1            | China             | 7576            |
| 22 | HNNY-01/CHN/2018                | 2018            | MN755857.1            | China             | 7576            |
| 23 | SZ1M-F/PSV/HUN/2013             | 2013            | MN807752.1            | Hungary           | 7534            |
| 24 | NGR_2017_NHP_SV                 | 2017            | MN784122.1            | South Korea       | 8207            |
| 25 | Jpsv447                         | 2009            | LC326556.1            | Japan             | 7582            |
| 26 | Jpsv1315                        | 2009            | LC326555.1            | Japan             | 7569            |
| 27 | XTND/2018                       | 2018            | LC493088.1            | Viet Nam          | 7537            |
| 28 | PSV_GER_L00798-K11_14-02_2014   | 2018            | LT900497.1            | Germany           | 7499            |
| 29 | HNHB-02                         | 2016            | MN939544.1            | China             | 7523            |
| 30 | HNXX-02                         | 2017            | MN939543.1            | China             | 7517            |
| 31 | HNHB-01/CHN/2016                | 2016            | MN939541.1            | China             | 7518            |
| 32 | OPY-1-Corsica-2017              | 2017            | MH513612.1            | France            | 7532            |
| 33 | ISU-SHIC                        | 2016            | KX810827.1            | USA               | 7389            |
| 34 | HuN4                            | 2015            | KX354743.1            | China             | 6,999           |
| 35 | HuN3                            | 2015            | KX354742.1            | China             | 6996            |
| 36 | HuN2                            | 2015            | KX354741.1            | China             | 6996            |
| 37 | HuN1                            | 2015            | KX354740.1            | China             | 6996            |
| 38 | QT2013                          | 2013            | KJ463384.1            | China             | 7532            |
| 39 | PSV/Porcine/JPN/Ishi-Ka2/2017   | 2017            | LC425416.1            | Japan             | 7534            |
| 40 | PSV/Porcine/JPN/MoI3/2016       | 2016            | LC425415.1            | Japan             | 7540            |
| 41 | PSV/Porcine/JPN/HgOg11/2018     | 2018            | LC425417.1            | Japan             | 7521            |
| 42 | PSV/Porcine/JPN/MoI2/2016       | 2016            | LC425414.1            | Japan             | 7514            |
| 43 | PSV/Porcine/JPN/HgYa1/2016      | 2016            | LC425413.1            | Japan             | 7526            |
| 44 | PSV/Porcine/JPN/Ishi-Ya8/2015   | 2015            | LC425412.1            | Japan             | 7528            |
| 45 | PSV/Porcine/JPN/Ishi-Ka1/2015   | 2015            | LC425411.1            | Japan             | 7545            |
| 46 | PSV/Porcine/JPN/Ishi-Im3/2015   | 2015            | LC425410.1            | Japan             | 7554            |
| 47 | PSV/Porcine/JPN/Ishi-Im1/2015   | 2015            | LC425409.1            | Japan             | 7547            |
| 48 | PSV/Porcine/JPN/HgYa2-4/2015    | 2015            | LC425408.1            | Japan             | 7475            |
| 49 | PSV/Porcine/JPN/HgYa2-3/2015    | 2015            | LC425407.1            | Japan             | 7535            |
| 50 | PSV/Porcine/JPN/HgYa2-2/2015    | 2015            | LC425406.1            | Japan             | 7515            |
| 51 | PSV/Porcine/JPN/HgYa2-1/2015    | 2015            | LC425405.1            | Japan             | 7525            |
| 52 | PSV/Porcine/JPN/HgTa2-2/2015    | 2015            | LC425404.1            | Japan             | 7525            |
| 53 | PSV/Porcine/JPN/HkKa2-3/2015    | 2015            | LC425403.1            | Japan             | 7540            |
| 54 | PSV/Porcine/JPN/HkKa2-2/2015    | 2015            | LC425402.1            | Japan             | 7555            |
| 55 | PSV/Porcine/JPN/HgTa2-1/2015    | 2015            | LC425401.1            | Japan             | 7540            |
| 56 | PSV/Porcine/JPN/Ishi-Miya3/2015 | 2015            | LC425399.1            | Japan             | 7508            |
| 57 | PSV/Porcine/JPN/Ishi-Ka2/2015   | 2015            | LC425398.1            | Japan             | 7543            |
| 58 | PSV/Porcine/JPN/Iba26-489S/2015 | 2015            | LC425397.1            | Japan             | 7531            |

|    |                              |      |            |       |      |
|----|------------------------------|------|------------|-------|------|
| 59 | PSV/Porcine/JPN/DeTk2-2/2015 | 2015 | LC425396.1 | Japan | 7428 |
| 60 | PSV/Porcine/JPN/HgOg2-5/2015 | 2015 | LC425395.1 | Japan | 7480 |
| 61 | PSV/Porcine/JPN/MoI2-2/2015  | 2015 | LC425394.1 | Japan | 7425 |
| 62 | PSV2020                      | 2020 | ON146286.1 | China | 7550 |

---
