# Supplementary material for: High Prevalence, Genetic Diversity, and Recombination of Porcine Sapelovirus in Pig Farms in Fujian, Southern China
Source: MDPI journal article supplement (doi:10.3390/v15081751), 2023-08-17
Supplement: s1 [file s1]

Supplementary Table S2 The primers for PSV whole genome amplification

| No. of<br>Primer | Primer      | Sequence (5'-3')                                          | Product size<br>(bp) |
|------------------|-------------|-----------------------------------------------------------|----------------------|
| 1                | PSV-F234    | AGAGTAGACAGTGAGCTATGGGCA                                  | 808                  |
|                  | PSV-R1042   | TAAAACCTATCTACAGATGTACCAGGAGT                             |                      |
| 2                | PSV-F922    | TAACAACACAAGAGGCAGCCA                                     | 401                  |
|                  | PSV-R1323   | GCTCTGTTGGATAGTTGTTACCCT                                  |                      |
| 3                | PSV-F1181   | TGTACAGTGTAATGCATCTAAATTCCA                               | 722                  |
|                  | PSV-R1903   | ACAACAGATCCTCTGTAATTTGCATA                                |                      |
| 4                | PSV-F1788   | ACACAAGGTAACCAGACAGCCAG                                   | 784                  |
|                  | PSV-R2572   | AGATGTCTCCTACCACTTGCGTT                                   |                      |
| 5                | PSV-F2414   | TGAATCTGACACTAACTCTGGTGGA                                 | 813                  |
|                  | PSV-R3227   | TGTAAATGAACCTCTATCAAACCTAACT                              |                      |
| 6                | PSV-F3068   | TAAAGCTAATGGTGATGCCAGACA                                  | 958                  |
|                  | PSV-R4026   | CCAAAGTGACATTTTACACTCATCT                                 |                      |
| 7                | PSV-F3832   | TGTCTGGAGAAGTTAAGAAACAAGTG                                | 969                  |
|                  | PSV-R4801   | GGAGGCCAACACAAAATCAGAA                                    |                      |
| 8                | PSV-F4578   | GATAATCAGAGACCCTATACCCTTCC                                | 1003                 |
|                  | PSV-R5581   | TGTTATCATAAATGCCCAATCCAG                                  |                      |
| 9                | PSV-F5390   | GGTTAGACTGTTTTCCACAAAGCA                                  | 1015                 |
|                  | PSV-R6405   | CTTCTTTCTAATCCCCATGGTGT                                   |                      |
| 10               | PSV-F6256   | TGGTTTCCAAATTTAAGGCAATAG                                  | 1046                 |
|                  | PSV-R7302   | CACCATTGTGCCATGCCA                                        |                      |
| 11               | 3' RACE-F1  | TTGGTTGCCTATCCCTATGAATTGGATC                              |                      |
| 12               | 3' RACE-F2  | CAGCAGACAAATCAACAACTTTCCAAACAG                            |                      |
| 13               | 5' RACE-R1  | TTCCATGGGGGGGTTTCAACTGACTA                                |                      |
| 14               | 5' RACE-R2  | GTATAGGCCCAAGTCCAGGTTTCCCAA                               |                      |
| 15               | 5' RACE-RT1 | GGTTTAGTGAACTGAGAGGGA                                     |                      |
| 16               | 5' RACE-RT2 | GTTCCATGCCTGAGAATAGT                                      |                      |
| 17               | 5' adaptor  | GCTGTCAACGATACGCTACGTAACGGCATGACAGTG<br>CCCCCCCCCCCCCCC   |                      |
| 18               | 3' adaptor  | GCTGTCAACGATACGCTACGTAACGGCATGACAGTG<br>TTTTTTTTTTTTTTTTT |                      |
| 19               | 5-3' outer  | GCTGTCAACGATACGCTACGTAAC                                  |                      |
| 20               | 5-3' inner  | GCTACGTAACGGCATGACAGTG                                    |                      |
